# Supplementary material
Source: PubMed Central journal article supplement (PMC3747794)
Supplement: supp_mct140_mct140supp.pdf [file supp_mct140_mct140supp.pdf]

## SUPPLEMENTARY DATA

FIG. S1. Phylogeny of 21 hummingbird-pollinated plant species, with response variables and plant trait values.

|                                     | Response variables |          |             |                  | Plant traits                  |                   |               |                      |
|-------------------------------------|--------------------|----------|-------------|------------------|-------------------------------|-------------------|---------------|----------------------|
|                                     | Fruit set          | Seed set | Seed weight | Seed germination | Index of Self incompatibility | Index of Autogamy | Plant density | Specialization level |
| <i>Sinningia cooperi</i>            | 1.04               | 0.40     | 4.54        | 5.21             | 1.03                          | 0.14              | 0.81          | 0.008                |
| <i>Sinningia gigantifolia</i>       | 3.28               | 1.23     | -4.51       | 0.78             | 1.17                          | 0.26              | 6.49          | 0.097                |
| <i>Nematanthus crassifolius</i>     | 0.31               | -0.60    | 2.54        | 2.32             | 0.58                          | 0                 | 41.38         | 0.153                |
| <i>Nematanthus lanceolatus</i>      | 0.14               | 0.30     | 0.26        | 0.29             | 1.10                          | 0                 | 6.49          | 0.282                |
| <i>Salvia sellowiana</i>            | 0.23               | -0.04    | 0.20        | ne               | 1.16                          | 0                 | 12.17         | 0.151                |
| <i>Staurogyne itatiaiae</i>         | -0.37              | 0.33     | -3.93       | -1.19            | 1.49                          | 0.17              | 8.11          | 0.167                |
| <i>Odontonema barbelerioides</i>    | 0.72               | ne       | 0.67        | ne               | 0.41                          | 0                 | 6.49          | 0.211                |
| <i>Justicia sebastianopolitanae</i> | -0.19              | -0.96    | -0.03       | ne               | 0.70                          | 0.1               | 104.67        | 0.232                |
| <i>Manettia mitis</i>               | 0.17               | -0.03    | 0.85        | 0.47             | 0.51                          | 0.24              | 7.3           | 0.222                |
| <i>Abutilon bedfordianum</i>        | 1.01               | 0.99     | 1.12        | 1.93             | 0.19                          | 0                 | 21.1          | 0.289                |
| <i>Tillandsia geminiflora</i>       | 1.93               | 0.82     | 0.92        | -0.08            | 0                             | 0                 | 15.42         | 0.087                |
| <i>Vriesea carinata</i>             | 0.90               | 0.82     | -1.38       | 0.27             | 0.95                          | 0.53              | 4.06          | 0.151                |
| <i>Vriesea gradata</i>              | 0.85               | 0.89     | 1.08        | 4.00             | 1.78                          | 0.74              | 21.91         | 0.195                |
| <i>Vriesea longicaulis</i>          | -0.21              | 0.08     | -0.51       | 0.54             | 1.4                           | 0.36              | 9.74          | 0.098                |
| <i>Pitcairnia flammea</i>           | 0.46               | 1.15     | -0.69       | 1.48             | 0.98                          | 0.58              | 18.66         | 0.037                |
| <i>Nidularium itatiaiae</i>         | 0.26               | 0.28     | 0.80        | 1.19             | 0.16                          | 0.04              | 33.27         | 0.169                |
| <i>Aechmea nudicaulis</i>           | 0.95               | 0.51     | 2.56        | 1.98             | 0.03                          | 0.03              | 1.62          | 0.156                |
| <i>Aechmea vanhoutteana</i>         | -0.12              | 0.28     | -4.01       | 0.00             | 0.23                          | 0                 | 2.43          | 0.187                |
| <i>Billbergia distachia</i>         | 0.65               | 0.35     | 0.12        | -1.67            | 0.25                          | 0                 | 8.93          | 0.050                |
| <i>Quesnelia augusto-coburgii</i>   | 0.07               | 0.46     | -2.13       | -2.10            | 0.07                          | 0.06              | 3.25          | 0.292                |
| <i>Elleanthus brasiliensis</i>      | 0.60               | ne       | ne          | ne               | 0.71                          | 0                 | 4.06          | 0.450                |

TABLE S1. Raw data (mean, standard deviation, and sample size) used to calculate effect size and variance per treatment (manual cross-pollination [Cp] and natural pollination [Np]) for 21 hummingbird-pollinated plant species for each response variable (fruit set, fruits/seed, seed weight, and seed germination). ne = not evaluated.

| Fruit set | manual cross-pollination (Cp)       |       |                    | natural pollination (Np) |       |                    | effect size | variance |             |
|-----------|-------------------------------------|-------|--------------------|--------------------------|-------|--------------------|-------------|----------|-------------|
|           | Species                             | mean  | standard deviation | sample size              | mean  | standard deviation |             |          | sample size |
|           | <i>Justicia sebastianopolitanae</i> | 31.21 | 39.13              | 22                       | 38.54 | 37.07              | 22          | -0.19    | 0.09        |
|           | <i>Odontonema barbelerioides</i>    | 30.95 | 38.81              | 7                        | 8.33  | 14.62              | 7           | 0.72     | 0.31        |
|           | <i>Staurogyne itatiaiae</i>         | 26.63 | 33.84              | 15                       | 37.81 | 25.18              | 15          | -0.37    | 0.14        |
|           | <i>Aechmea nudicaulis</i>           | 60.21 | 27.03              | 8                        | 30.19 | 32.21              | 8           | 0.95     | 0.29        |
|           | <i>Aechmea vanhoutteana</i>         | 93.71 | 8.32               | 7                        | 94.61 | 5.07               | 7           | -0.12    | 0.29        |
|           | <i>Billbergia distachia</i>         | 85.12 | 29.27              | 14                       | 60.12 | 43.56              | 14          | 0.65     | 0.15        |
|           | <i>Nidularium itatiaiae</i>         | 76.02 | 32.86              | 19                       | 67.09 | 33.98              | 19          | 0.26     | 0.11        |
|           | <i>Pitcairnia flammea</i>           | 88.81 | 17.03              | 14                       | 78.33 | 26.37              | 14          | 0.46     | 0.15        |
|           | <i>Quesnelia augusto-coburgii</i>   | 87.63 | 23.35              | 21                       | 86.12 | 20.41              | 21          | 0.07     | 0.1         |
|           | <i>Tillandsia geminiflora</i>       | 95.83 | 8.33               | 4                        | 32.5  | 39.48              | 4           | 1.93     | 0.93        |
|           | <i>Vriesea carinata</i>             | 75    | 50                 | 4                        | 33.33 | 27.22              | 4           | 0.9      | 0.59        |
|           | <i>Vriesea gradata</i>              | 42.11 | 50.73              | 19                       | 9.73  | 14.67              | 19          | 0.85     | 0.12        |
|           | <i>Vriesea longicaulis</i>          | 44.44 | 52.7               | 9                        | 54.81 | 39.79              | 9           | -0.21    | 0.22        |
|           | <i>Nematanthus crassifolius</i>     | 71.67 | 34.47              | 15                       | 59.56 | 41.56              | 15          | 0.31     | 0.14        |
|           | <i>Nematanthus lanceolatus</i>      | 48.96 | 41.41              | 8                        | 42.98 | 41.7               | 8           | 0.14     | 0.25        |

|                                |       |       |    |       |       |    |      |      |
|--------------------------------|-------|-------|----|-------|-------|----|------|------|
| <i>Sinningia cooperi</i>       | 85.63 | 18.07 | 4  | 46.25 | 43.08 | 4  | 1.04 | 0.62 |
| <i>Sinningia gigantifolia</i>  | 51.75 | 14.6  | 6  | 4.76  | 11.66 | 6  | 3.28 | 0.98 |
| <i>Salvia sellowiana</i>       | 57.88 | 40.92 | 11 | 48.23 | 39.94 | 11 | 0.23 | 0.18 |
| <i>Abutilon bedfordianum</i>   | 70.31 | 29.01 | 19 | 40.41 | 28.99 | 19 | 1.01 | 0.12 |
| <i>Elleanthus brasiliensis</i> | 52.5  | 5     | 4  | 29.29 | 47.33 | 4  | 0.6  | 0.54 |
| <i>Manettia mitis</i>          | 67.62 | 20.74 | 10 | 63.13 | 29.25 | 10 | 0.17 | 0.2  |

| Seeds/fruit                         | Manual cross-pollination (Cp) |        |                    | Natural pollination (Np) |        |                    | effect size | variance |             |
|-------------------------------------|-------------------------------|--------|--------------------|--------------------------|--------|--------------------|-------------|----------|-------------|
|                                     | Species                       | mean   | standard deviation | sample size              | mean   | standard deviation |             |          | sample size |
| <i>Justicia sebastianopolitanae</i> |                               | 1.90   | 0.99               | 10                       | 2.90   | 0.99               | 10          | -0.96    | 0.23        |
| <i>Odontonema barbelerioides</i>    |                               |        |                    |                          | ne     |                    |             |          |             |
| <i>Staurogyne itatiaiae</i>         |                               | 40.00  | 1.73               | 3                        | 39.00  | 3.00               | 3           | 0.33     | 0.69        |
| <i>Aechmea nudicaulis</i>           |                               | 41.48  | 31.13              | 21                       | 22.50  | 42.40              | 16          | 0.51     | 0.11        |
| <i>Aechmea vanhoutteana</i>         |                               | 131.65 | 41.56              | 81                       | 118.82 | 48.48              | 122         | 0.28     | 0.02        |
| <i>Billbergia distachia</i>         |                               | 178.36 | 63.89              | 25                       | 148.61 | 99.77              | 23          | 0.35     | 0.08        |
| <i>Nidularium itatiaiae</i>         |                               | 474.48 | 172.76             | 46                       | 418.37 | 208.05             | 92          | 0.28     | 0.03        |
| <i>Pitcairnia flammea</i>           |                               | 569.91 | 149.92             | 11                       | 291.42 | 290.41             | 12          | 1.15     | 0.21        |
| <i>Quesnelia augusto-coburgii</i>   |                               | 154.62 | 57.55              | 34                       | 119.07 | 85.46              | 55          | 0.46     | 0.05        |

|                                 |         |        |    |         |        |    |       |      |
|---------------------------------|---------|--------|----|---------|--------|----|-------|------|
| <i>Tillandsia geminiflora</i>   | 65.57   | 11.77  | 7  | 49.80   | 24.16  | 5  | 0.82  | 0.38 |
| <i>Vriesea carinata</i>         | 591.67  | 231.19 | 3  | 421.75  | 122.66 | 4  | 0.82  | 0.68 |
| <i>Vriesea gradata</i>          | 826.67  | 304.07 | 3  | 409.00  | 446.67 | 4  | 0.89  | 0.70 |
| <i>Vriesea longicaulis</i>      | 1218.00 | 637.97 | 6  | 1178.60 | 123.98 | 5  | 0.08  | 0.37 |
| <i>Nematanthus crassifolius</i> | 276.71  | 95.22  | 7  | 355.78  | 144.42 | 9  | -0.60 | 0.27 |
| <i>Nematanthus lanceolatus</i>  | 351.67  | 223.92 | 6  | 282.13  | 217.92 | 8  | 0.30  | 0.30 |
| <i>Sinningia cooperi</i>        | 2045.11 | 932.96 | 9  | 1663.13 | 861.30 | 8  | 0.40  | 0.24 |
| <i>Sinningia gigantifolia</i>   | 1029.33 | 241.75 | 3  | 413.50  | 525.38 | 2  | 1.23  | 1.38 |
| <i>Salvia sellowiana</i>        | 2.36    | 1.08   | 14 | 2.40    | 1.10   | 20 | -0.04 | 0.12 |
| <i>Abutilon bedfordianum</i>    | 61.86   | 14.11  | 29 | 45.13   | 20.59  | 15 | 0.99  | 0.11 |
| <i>Elleanthus brasiliensis</i>  |         |        |    |         | ne     |    |       |      |
| <i>Manettia mitis</i>           | 30.18   | 13.51  | 22 | 30.82   | 23.89  | 22 | -0.03 | 0.09 |

| Seed weight                         | Manual cross-pollination (Cp) |         |                    | Natural pollination (Np) |        |                    | effect size | variance |
|-------------------------------------|-------------------------------|---------|--------------------|--------------------------|--------|--------------------|-------------|----------|
|                                     | Species                       | mean    | standard deviation | sample size              | mean   | standard deviation |             |          |
| <i>Justicia sebastianopolitanae</i> | 364.55                        | 154.84  | 33.00              | 369.12                   | 131.69 | 68.00              | -0.03       | 0.05     |
| <i>Odontonema barbelerioides</i>    | 1723.13                       | 2077.15 | 16.00              | 1016.33                  | 251.13 | 49.00              | 0.67        | 0.09     |
| <i>Staurogyne itatiaiae</i>         | 29.57                         | 1.06    | 7.00               | 35.21                    | 1.58   | 7.00               | -3.93       | 1.04     |

|                                   |        |        |       |        |        |       |       |      |
|-----------------------------------|--------|--------|-------|--------|--------|-------|-------|------|
| <i>Aechmea nudicaulis</i>         | 33.47  | 1.45   | 10.00 | 28.87  | 1.95   | 10.00 | 2.56  | 0.40 |
| <i>Aechmea vanhoutteana</i>       | 53.15  | 1.56   | 10.00 | 62.10  | 2.59   | 10.00 | -4.01 | 0.69 |
| <i>Billbergia distachia</i>       | 97.70  | 1.84   | 10.00 | 97.38  | 3.12   | 10.00 | 0.12  | 0.20 |
| <i>Nidularium itatiaiae</i>       | 26.30  | 0.80   | 10.00 | 25.58  | 0.93   | 10.00 | 0.80  | 0.22 |
| <i>Pitcairnia flammea</i>         | 9.18   | 0.38   | 10.00 | 9.62   | 0.77   | 10.00 | -0.69 | 0.22 |
| <i>Quesnelia augusto-coburgii</i> | 46.25  | 1.32   | 10.00 | 52.65  | 3.85   | 10.00 | -2.13 | 0.34 |
| <i>Tillandsia geminiflora</i>     | 38.90  | 4.47   | 10.00 | 34.63  | 4.46   | 10.00 | 0.92  | 0.23 |
| <i>Vriesea carinata</i>           | 34.00  | 1.08   | 10.00 | 36.35  | 2.05   | 10.00 | -1.38 | 0.26 |
| <i>Vriesea gradata</i>            | 19.48  | 2.00   | 10.00 | 17.30  | 1.87   | 10.00 | 1.08  | 0.24 |
| <i>Vriesea longicaulis</i>        | 22.34  | 6.95   | 10.00 | 24.98  | 1.07   | 10.00 | -0.51 | 0.21 |
| <i>Nematanthus crassifolius</i>   | 17.82  | 0.57   | 10.00 | 16.16  | 0.68   | 10.00 | 2.54  | 0.40 |
| <i>Nematanthus lanceolatus</i>    | 13.44  | 1.08   | 10.00 | 13.22  | 0.38   | 10.00 | 0.26  | 0.20 |
| <i>Sinningia cooperi</i>          | 2.42   | 0.13   | 5.00  | 1.86   | 0.09   | 5.00  | 4.54  | 2.04 |
| <i>Sinningia gigantifolia</i>     | 2.20   | 0.14   | 5.00  | 2.78   | 0.08   | 5.00  | -4.51 | 2.02 |
| <i>Salvia sellowiana</i>          | 748.95 | 164.58 | 19.00 | 709.36 | 218.77 | 31.00 | 0.20  | 0.09 |
| <i>Abutilon bedfordianum</i>      | 435.40 | 41.13  | 10.00 | 399.00 | 15.24  | 10.00 | 1.12  | 0.24 |
| <i>Elleanthus brasiliensis</i>    |        |        |       |        | ne     |       |       |      |
| <i>Manettia mitis</i>             | 11.05  | 1.29   | 10.00 | 10.08  | 0.87   | 10.00 | 0.85  | 0.22 |

---

| Seed germination                    | Manual cross-pollination (Cp) |       |                    | Natural pollination (Np) |       |                    | effect size | variance |
|-------------------------------------|-------------------------------|-------|--------------------|--------------------------|-------|--------------------|-------------|----------|
|                                     | Species                       | mean  | standard deviation | sample size              | mean  | standard deviation |             |          |
| <i>Justicia sebastianopolitanae</i> |                               |       |                    |                          | ne    |                    |             |          |
| <i>Odontonema barbelerioides</i>    |                               |       |                    |                          | ne    |                    |             |          |
| <i>Staurogyne itatiaiae</i>         | 60.42                         | 5.59  | 6.00               | 69.58                    | 8.37  | 6.00               | -1.19       | 0.42     |
| <i>Aechmea nudicaulis</i>           | 72.75                         | 12.71 | 10.00              | 51.00                    | 7.75  | 10.00              | 1.98        | 0.32     |
| <i>Aechmea vanhoutteana</i>         | 95.42                         | 3.95  | 6.00               | 95.42                    | 3.54  | 6.00               | 0.00        | 0.33     |
| <i>Billbergia distachia</i>         | 89.75                         | 5.37  | 10.00              | 96.75                    | 1.82  | 10.00              | -1.67       | 0.29     |
| <i>Nidularium itatiaiae</i>         | 97.08                         | 4.18  | 6.00               | 91.25                    | 4.81  | 6.00               | 1.19        | 0.42     |
| <i>Pitcairnia flammea</i>           | 95.42                         | 4.68  | 6.00               | 88.75                    | 3.54  | 6.00               | 1.48        | 0.47     |
| <i>Quesnelia augusto-coburgii</i>   | 88.75                         | 4.51  | 10.00              | 96.75                    | 2.53  | 10.00              | -2.10       | 0.33     |
| <i>Tillandsia geminiflora</i>       | 89.58                         | 5.70  | 6.00               | 90.00                    | 4.54  | 6.00               | -0.08       | 0.33     |
| <i>Vriesea carinata</i>             | 96.00                         | 2.80  | 10.00              | 95.00                    | 4.10  | 10.00              | 0.27        | 0.20     |
| <i>Vriesea gradata</i>              | 96.00                         | 3.77  | 10.00              | 78.25                    | 4.68  | 10.00              | 4.00        | 0.69     |
| <i>Vriesea longicaulis</i>          | 94.75                         | 3.25  | 10.00              | 92.50                    | 4.68  | 10.00              | 0.54        | 0.21     |
| <i>Nematanthus crassifolius</i>     | 40.75                         | 13.35 | 10.00              | 14.50                    | 7.51  | 10.00              | 2.32        | 0.37     |
| <i>Nematanthus lanceolatus</i>      | 42.92                         | 8.55  | 6.00               | 38.33                    | 18.66 | 6.00               | 0.29        | 0.34     |
| <i>Sinningia cooperi</i>            | 87.20                         | 7.97  | 10.00              | 34.20                    | 11.24 | 10.00              | 5.21        | 1.03     |
| <i>Sinningia gigantifolia</i>       | 60.42                         | 14.96 | 6.00               | 46.25                    | 18.51 | 6.00               | 0.78        | 0.37     |

|                                |       |       |       |       |    |      |       |      |      |
|--------------------------------|-------|-------|-------|-------|----|------|-------|------|------|
| <i>Salvia sellowiana</i>       |       |       |       |       | ne |      |       |      |      |
| <i>Abutilon bedfordianum</i>   | 9.00  | 5.86  | 10.00 | 0.50  |    | 1.10 | 10.00 | 1.93 | 0.31 |
| <i>Elleanthus brasiliensis</i> |       |       |       |       | ne |      |       |      |      |
| <i>Manettia mitis</i>          | 51.50 | 14.29 | 10.00 | 45.75 |    | 8.73 | 10.00 | 0.47 | 0.21 |
